# Supplementary material for: Peptide-crosslinked molecularly imprinted polymers for efficient separation of immunoglobulin G from human serum
Source: Royal Society of Chemistry journal article supplement (doi:10.1039/d2bm01450e), 2022-12-15
Supplement: d2bm01450e1.pdf [file d2bm01450e1.pdf]

## Supporting Information

# Peptide-crosslinked molecularly imprinted polymers for efficient separation of immunoglobulin G from human serum

*Qiuqing Dong<sup>a</sup>, Mengmeng Yang<sup>a</sup>, Yafei Wang,<sup>a</sup> Ying Guan <sup>a, \*</sup>, Wangqing Zhang<sup>a, \*</sup>,*

*Yongjun Zhang<sup>b, \*</sup>*

<sup>a</sup> Key Laboratory of Functional Polymer Materials and State Key Laboratory of Medicinal Chemical Biology, Institute of Polymer Chemistry, College of Chemistry, Nankai University, Tianjin 300071, China. <sup>b</sup> School of Chemistry, Tiangong

University, Tianjin 300387, China

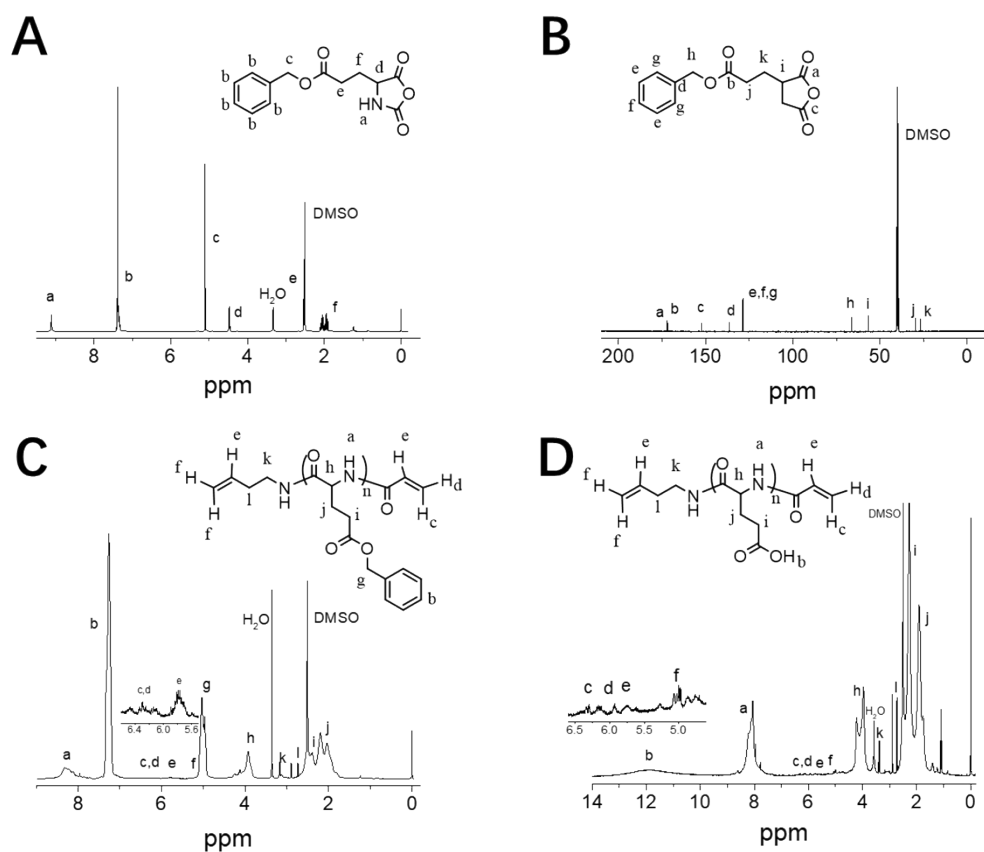

**Fig. S1.** (A, B)  $^1\text{H}$  (A) and  $^{13}\text{C}$  NMR spectra (B) of BLG-NCA monomer. (C, D)  $^1\text{H}$  NMR spectra of PBLG intermediate (C) and PLGA crosslinker (D). Solvent: DMSO- $d_6$ .

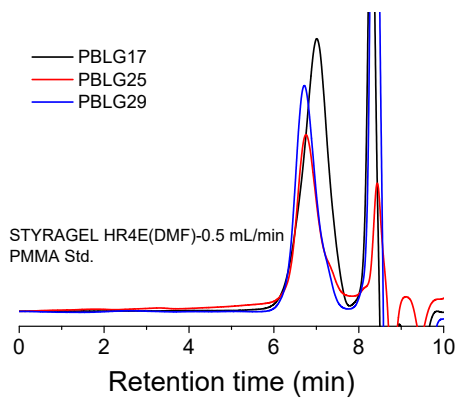

**Fig. S2.** GPC traces of PBLG intermediates in DMF solution at flow rate of 0.5 mL/min using STYRAGEL HR4E column and PMMA standards.

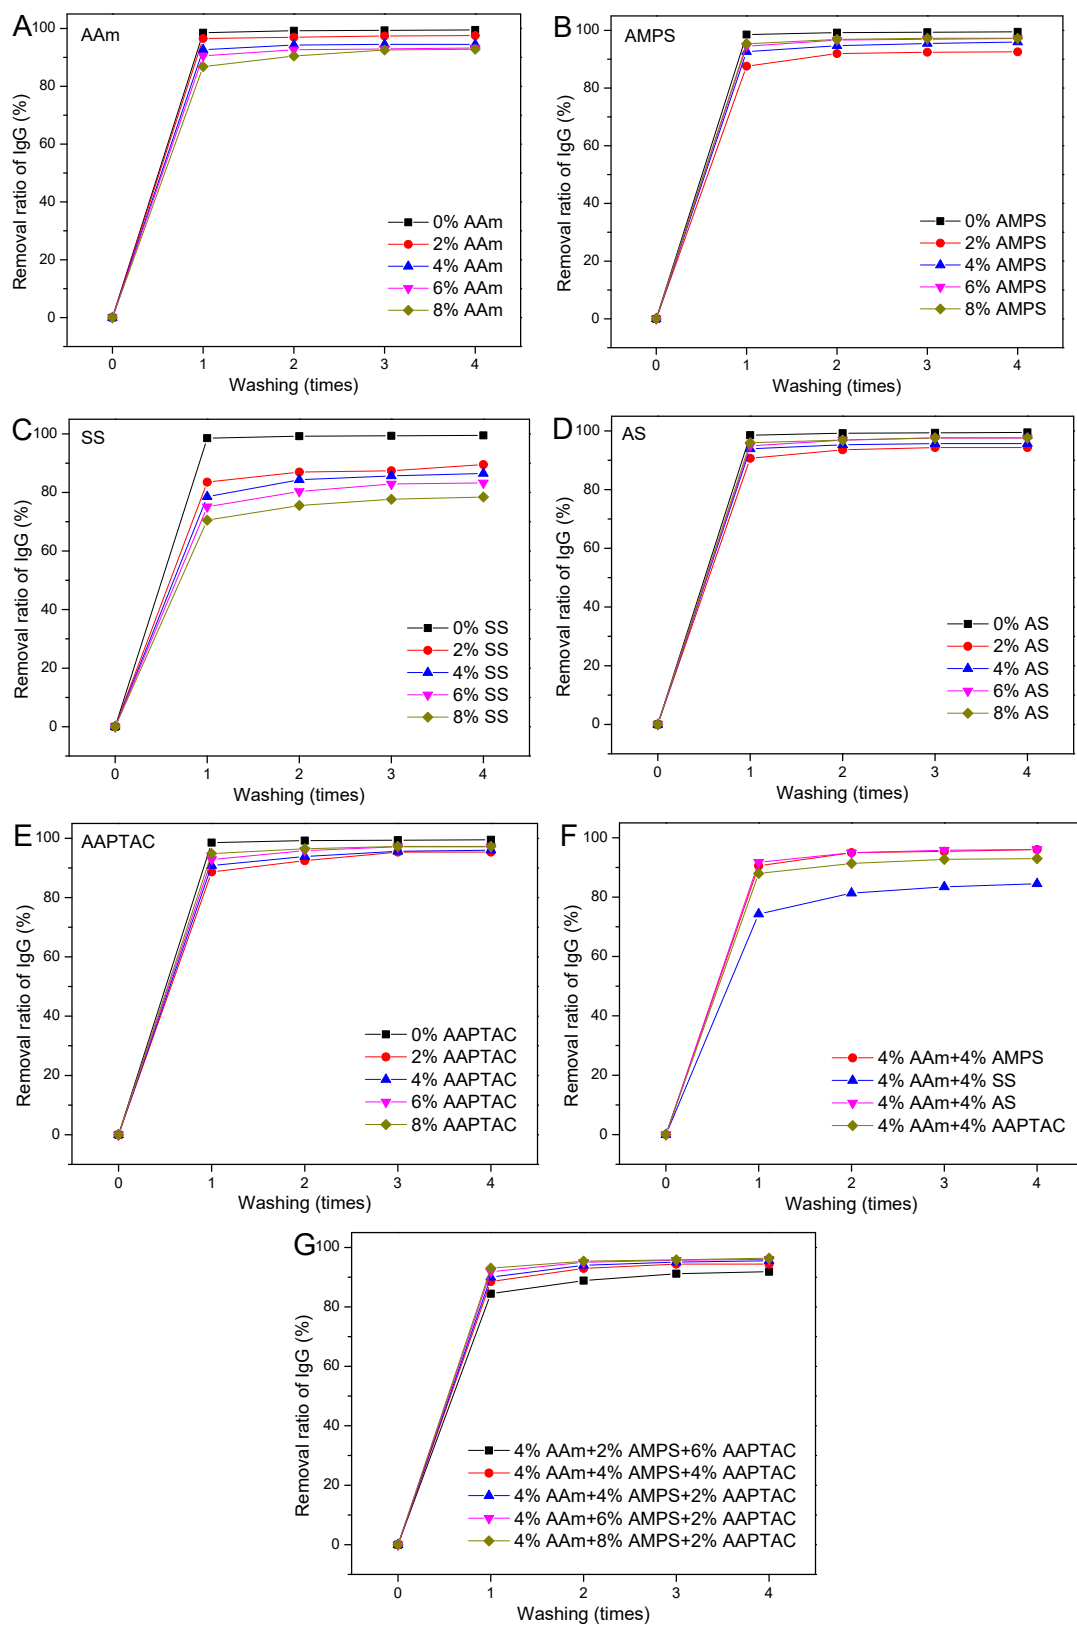

**Fig. S3.** Elution efficiency of 2% PLGA25-crosslinked MIP in 20 mM pH 7.4 PBS containing 154 mM NaCl at 37 °C. (A) AAm functional monomer content from 0% to 8%. (B) AMPS functional monomer content from 0% to 8%. (C) SS functional monomer content from 0% to 8%. (D) AS functional monomer content from 0% to 8%. (E) AAPTAC functional monomer content from 0% to 8%. (F) Combination of two functional monomers. (G) Combination of three functional monomers. IgG used in the preparation of the MIP was 45 mg.

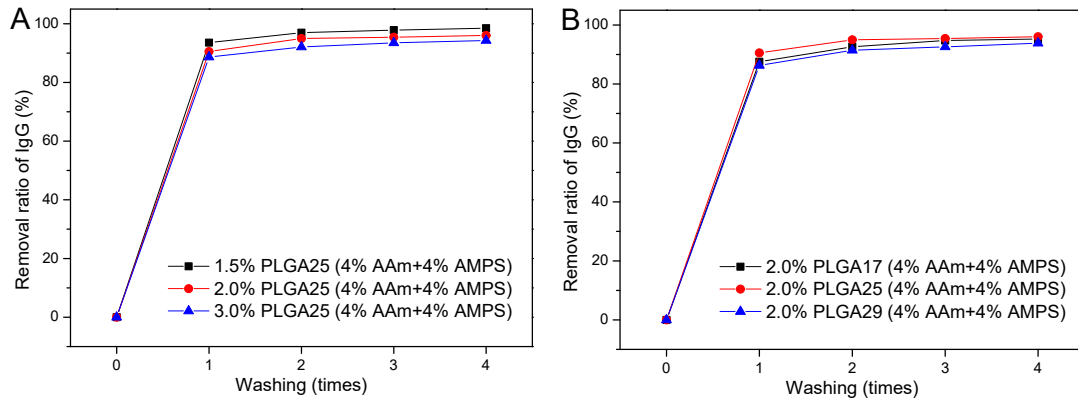

**Fig. S4.** Elution efficiency of PLGA-crosslinked MIP in 20 mM pH 7.4 PBS containing 154 mM NaCl at 37 °C. (A) Different amount of PLGA25 from 1.5% to 3.0% with 4% AAm and 4% AMPS functional monomers. (B) Different molecular weight of 2% PLGA with 4% AAm and 4% AMPS functional monomers. IgG used in the preparation of the MIP was 45 mg.

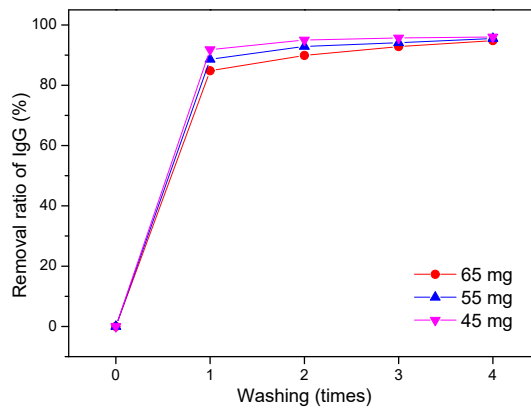

**Fig. S5.** Elution efficiency of 2% PLGA25-crosslinked MIP in 20 mM pH 7.4 PBS containing 154 mM NaCl at 37 °C. The functional monomers were consisting of 4% AAm, 6% AMPS and 2% AAPTAC. IgG used in the preparation of the MIP was 45 mg, 55 mg and 65 mg.

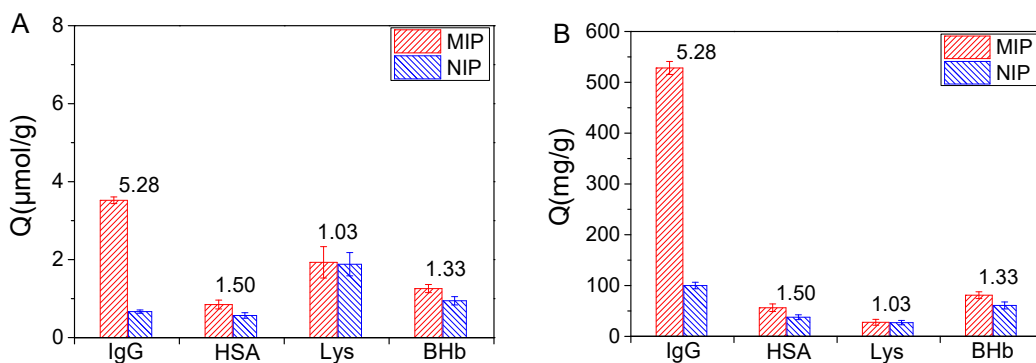

**Fig. S6.** (A) Adsorption of different proteins onto IgG-PLGA25-MIP1 and IgG-PLGA25-NIP1.  $C_{0, \text{protein}} = 3.33 \mu\text{mol/L}$ . The binding amounts of proteins were expressed in  $\mu\text{mol/g}$  (A) and  $\text{mg/g}$  (B).

**Table S1.** Synthesis and GPC characterization of PBLG intermediates.

| Sample | [M]/[I] <sup>a)</sup> | DP <sup>b)</sup> | Mn[Da] <sup>b)</sup> | Mw/Mn <sup>b)</sup> |
|--------|-----------------------|------------------|----------------------|---------------------|
| PBLG17 | 20/1                  | 17               | 3874                 | 1.55                |
| PBLG25 | 27/1                  | 25               | 5535                 | 1.47                |
| PBLG29 | 32/1                  | 29               | 6437                 | 1.39                |

<sup>a)</sup> Feeding molar ratio of monomer/initiator; <sup>b)</sup> Determined by GPC.

**Table S2.** Recipes of the IgG MIPs for the study of effect of pH, the length of the peptide crosslinker, and crosslink density.

|                 | Crosslink density<br>(mol%) | IgG<br>(mg) | NIPAM<br>(mg) | AAM<br>(mg) | AMPS<br>(mg) | AAPTAC<br>( $\mu$ L) |
|-----------------|-----------------------------|-------------|---------------|-------------|--------------|----------------------|
| IgG-PLGA25-MIP2 | 2                           | 45.0        | 113.0         | 2.8         | 8.3          | 0                    |
| IgG-PLGA17-MIP2 | 2                           | 45.0        | 113.0         | 2.8         | 8.3          | 0                    |
| IgG-PLGA29-MIP2 | 2                           | 45.0        | 113.0         | 2.8         | 8.3          | 0                    |
| IgG-PLGA25-MIP3 | 1.5                         | 45.0        | 113.0         | 2.8         | 8.3          | 0                    |
| IgG-PLGA25-MIP4 | 3                           | 45.0        | 113.0         | 2.8         | 8.3          | 0                    |

**Table S3.** PLGA25-crosslinked MIPs using AAm as functional monomer.

|        | PLGA25<br>(mol%) | IgG<br>(mg) | NIPAM<br>(mg) | AAm<br>(mg) |
|--------|------------------|-------------|---------------|-------------|
| 0% AAm | 2                | 45.0        | 113.0         | 0           |
| 2% AAm | 2                | 45.0        | 113.0         | 1.4         |
| 4% AAm | 2                | 45.0        | 113.0         | 2.8         |
| 6% AAm | 2                | 45.0        | 113.0         | 4.2         |
| 8% AAm | 2                | 45.0        | 113.0         | 5.6         |

**Table S4.** PLGA25-crosslinked MIPs using AMPS as functional monomer.

|         | PLGA25<br>(mol%) | IgG<br>(mg) | NIPAM<br>(mg) | AMPS<br>(mg) |
|---------|------------------|-------------|---------------|--------------|
| 0% AMPS | 2                | 45.0        | 113.0         | 0            |
| 2% AMPS | 2                | 45.0        | 113.0         | 4.1          |
| 4% AMPS | 2                | 45.0        | 113.0         | 8.3          |
| 6% AMPS | 2                | 45.0        | 113.0         | 12.4         |
| 8% AMPS | 2                | 45.0        | 113.0         | 16.6         |

**Table S5.** PLGA25-crosslinked MIPs using SS as functional monomer.

|       | PLGA25<br>(mol%) | IgG<br>(mg) | NIPAM<br>(mg) | SS<br>(mg) |
|-------|------------------|-------------|---------------|------------|
| 0% SS | 2                | 45.0        | 113.0         | 0          |
| 2% SS | 2                | 45.0        | 113.0         | 4.1        |
| 4% SS | 2                | 45.0        | 113.0         | 8.2        |
| 6% SS | 2                | 45.0        | 113.0         | 12.4       |
| 8% SS | 2                | 45.0        | 113.0         | 16.5       |

**Table S6.** PLGA25-crosslinked MIPs using AS as functional monomer.

|       | PLGA25<br>(mol%) | IgG<br>(mg) | NIPAM<br>(mg) | AS<br>(mg) |
|-------|------------------|-------------|---------------|------------|
| 0% AS | 2                | 45.0        | 113.0         | 0          |
| 2% AS | 2                | 45.0        | 113.0         | 2.9        |
| 4% AS | 2                | 45.0        | 113.0         | 5.8        |
| 6% AS | 2                | 45.0        | 113.0         | 8.7        |
| 8% AS | 2                | 45.0        | 113.0         | 11.6       |

**Table S7.** Preparation formula of PLGA25-crosslinked MIP using AAPTAC as a functional monomer

|           | PLGA25<br>(mol%) | IgG<br>(mg) | NIPAM<br>(mg) | AAPTAC<br>(mg) |
|-----------|------------------|-------------|---------------|----------------|
| 0% AAPTAC | 2                | 45.0        | 113.0         | 0              |
| 2% AAPTAC | 2                | 45.0        | 113.0         | 2.9            |
| 4% AAPTAC | 2                | 45.0        | 113.0         | 5.8            |
| 6% AAPTAC | 2                | 45.0        | 113.0         | 8.7            |
| 8% AAPTAC | 2                | 45.0        | 113.0         | 11.6           |

**Table S8.** PLGA25-crosslinked MIPs with two functional monomers.

|                                     | PLGA25<br>(mol%) | IgG<br>(mg) | NIPAM<br>(mg) | AAm<br>(mg) | AMPS<br>(mg) | SS<br>(mg) | AS<br>(mg) | AAPTAC<br>( $\mu$ L) |
|-------------------------------------|------------------|-------------|---------------|-------------|--------------|------------|------------|----------------------|
| 4% AAm+4% AMPS<br>(IgG-PLGA25-MIP2) | 2                | 45.0        | 113.0         | 2.8         | 8.3          |            |            |                      |
| 4% AAm+4% SS                        | 2                | 45.0        | 113.0         | 2.8         |              | 8.2        |            |                      |
| 4% AAm+4% AS                        | 2                | 45.0        | 113.0         | 2.8         |              |            | 5.8        |                      |
| 4% AAm+4%<br>AAPTAC                 | 2                | 45.0        | 113.0         | 2.8         |              |            |            | 10.0                 |

**Table S9.** PLGA25-crosslinked MIPs with three functional monomers.

|                             | PLGA25<br>(mol%) | IgG<br>(mg) | NIPAM<br>(mg) | AAm<br>(mg) | AMPS<br>(mg) | SS<br>(mg) | AS<br>(mg) | AAPTAC<br>( $\mu$ L) |
|-----------------------------|------------------|-------------|---------------|-------------|--------------|------------|------------|----------------------|
| 4% AAm+4%<br>AMPS+4% AAPTAC | 2                | 45.0        | 113.0         | 2.8         | 8.3          |            |            | 10.0                 |
| 4% AAm+4%<br>AMPS+2% AAPTAC | 2                | 45.0        | 113.0         | 2.8         | 8.3          |            |            | 5.0                  |
| 4% AAm+6%<br>AMPS+2% AAPTAC | 2                | 45.0        | 113.0         | 2.8         | 12.4         |            |            | 5.0                  |
| 4% AAm+8%<br>AMPS+2% AAPTAC | 2                | 45.0        | 113.0         | 2.8         | 16.6         |            |            | 5.0                  |
| 4% AAm+2%<br>AMPS+6% AAPTAC | 2                | 45.0        | 113.0         | 2.8         | 4.1          |            |            | 15.0                 |

**Table S10.** Recipes of the IgG MIPs with different feeding amount of IgG.

|                 | PLGA25<br>(mol%) | IgG<br>(mg) | NIPAM<br>(mg) | AAm<br>(mg) | AMPS<br>(mg) | AAPTAC<br>( $\mu$ L) |
|-----------------|------------------|-------------|---------------|-------------|--------------|----------------------|
| IgG-PLGA25-MIP1 | 2                | 55.0        | 113.0         | 2.8         | 12.4         | 5.0                  |
| IgG-PLGA25-MIP5 | 2                | 45.0        | 113.0         | 2.8         | 12.4         | 5.0                  |
| IgG-PLGA25-MIP6 | 2                | 65.0        | 113.0         | 2.8         | 12.4         | 5.0                  |

**Table S11.** Performance of MIPs using different polymerization times. The formula of IgG-PLGA25-MIP1 was used for the MIPs.

| Polymerization time (h) | Elution Efficiency<br>(%) | $Q_{MIP}$ (mg/g) | $Q_{NIP}$ (mg/g) | IF   |
|-------------------------|---------------------------|------------------|------------------|------|
| 6                       | 98.9                      | 327.8            | 90.5             | 3.62 |
| 12                      | 96.2                      | 502.2            | 98.8             | 5.08 |
| 18                      | 95.8                      | 520.9            | 99.6             | 5.23 |
| 24                      | 95.5                      | 528.3            | 100.1            | 5.28 |

$Q_{MIP}$  or  $Q_{NIP}$ : rebinding capacity of IgG on MIP or NIP.  $C_{0, IgG}$  = 0.5 mg/mL, 20 mM pH 5.0 phosphate buffer, T = 37°C.

**Table S12.** Optimization of the separation procedure.

| Swelling Equilibrium Time<br>(h) | Rebinding Time<br>(h) | Elution Time<br>(h) | Purity<br>(%) | Separation<br>Yield (%) |
|----------------------------------|-----------------------|---------------------|---------------|-------------------------|
| 24                               | 24                    | 24                  | 91            | 78                      |
| 24                               | 18                    | 24                  | 92            | 77                      |
| 24                               | 12                    | 24                  | 90            | 75                      |
| 24                               | 6                     | 24                  | 84            | 53                      |
| 18                               | 24                    | 24                  | 86            | 72                      |
| 12                               | 24                    | 24                  | 65            | 59                      |
| 24                               | 24                    | 18                  | 89            | 73                      |
| 24                               | 24                    | 12                  | 90            | 62                      |
